# Supplementary material for: Alterations in reward network functional connectivity are associated with increased food addiction in obese individuals
Source: PubMed Central journal article supplement (PMC7873272; doi:10.1038/s41598-021-83116-0), 2021-02-09

**Alterations in Reward Network Functional Connectivity are Associated with Increased Food Addiction in Obese Individuals**

Soumya Ravichandran<sup>1</sup>, Ravi R. Bhatt<sup>1,6</sup>, Bilal Pandit<sup>1</sup>, Vadim Osadchiy<sup>1,2</sup>, Anita Alaverdyan<sup>1</sup>, Priten Vora<sup>1</sup>, Jean Stains<sup>1-3</sup>, Bruce Naliboff<sup>1-4</sup>, Emeran A. Mayer<sup>1-5</sup>, Arpana Gupta\*<sup>1-4</sup>

## SUPPLEMENTARY MATERIALS

### SUPPLEMENTARY TABLES

#### **Supplemental Table S1. Resting State Pairwise Connections Comparing Females with Food Addiction vs. Females with No Food Addiction**

This table summarizes significant functional connectivity, comparing disease effect within females (females with food addiction vs. females with no food addiction). All connections are significant  $q < 0.05$ .

Abbreviations: ACgG\_S, Middle-anterior part of the cingulate gyrus and sulcus; Bst, Brainstem Network; CAN, Central Autonomic Network; CEN, Central Executive Network; ERN, Emotional Regulation Network; InfFGOpp, Opercular part of the inferior frontal gyrus; InfFGTrip, Triangular part of the inferior frontal gyrus; InfFS, Inferior frontal sulcus; IntPS\_TrPS, Intraparietal sulcus(interparietal sulcus) and transverse parietal sulci; LC, locus coeruleus; LinG, Lingual gyrus, lingual part of the medial occipito-temporal gyrus; OCC, Occipital Network; OrG, Orbital gyri; PaCL\_S, Paracentral lobule and sulcus; PRCG, Precentral gyrus; SbCG\_S, Subcentral gyrus and sulci; SMN, Sensorimotor Network; SupPL, Superior parietal lobule(lateral part of P1)

df: degrees of freedom; p value significant  $< .05$ , q value (corrected for multiple comparisons)  $< .05$

#### **Supplemental Table S2. Resting State Pairwise Connections Comparing Males with Food Addiction vs. Males with No Food Addiction**

This table summarizes significant functional connectivity, comparing disease effect within males (males with food addiction vs. males with no food addiction). All connections are significant  $q < 0.05$ .

Abbreviations: ATrCoS, Anterior transverse collateral sulcus; Bst, Brainstem Network; CAN, Central Autonomic Network; CEN, Central Executive Network; CS, Central sulcus(Rolando's fissure); DMN, Default Mode Network; ERN, Emotional Regulation Network; InfFGOpp, Opercular part of the inferior frontal gyrus; InfPrCS, Inferior part of the precentral sulcus; MOcG, Middle occipital gyrus; MFG, Middle frontal gyrus; MR, Median raphé nuclei; MRF, Mesencephalic reticular formation; OCC, Occipital Network; OrG, Orbital gyri; OrS, Orbital sulci(H-shaped sulci); PaCL\_S, Paracentral lobule and sulcus; PaHipG, Parahippocampal gyrus, parahippocampal part of the medial occipito-temporal gyrus; PBC, Parabrachial complex; PRCG, Precentral gyrus; PrCun, Precuneus; Tpo, temporal pole; SAL, Salience Network; SMN, Sensorimotor Network; SuMarG, Supramarginal gyrus

df: degrees of freedom; p value significant  $< .05$ , q value (corrected for multiple comparisons)  $< .05$

## SUPPLEMENTARY FIGURES

### **Supplemental Figure S1. Connectogram Depicting Differences in Brain Connectivity between Females with Food Addiction vs. Females with No Food Addiction**

Supplemental Figure 1 is a connectogram demonstrating significant differences in functional connectivity between females with food addiction and females with no food addiction. Analysis was performed Harvard-Oxford Subcortical atlases, the Schaefer 400 cortical atlas, and the Ascending Arousal Network brainstem atlas. Labels on the diagram are Destrieux, Harvard-Oxford Subcortical atlases, and the Ascending Arousal Network brainstem atlas equivalents. Red lines between two networks indicate greater functional connectivity, and blue lines indicate lowered functional connectivity. All connections are significant  $q < 0.05$ .

Legend: Light Green: SMN (Sensorimotor Network); Black: BG (Basal Ganglia); Purple: DMN (Default Mode Network); Yellow: SAL (Salience); Red: ERN (Emotional Regulation Network); Dark Green: CAN (Central Autonomic Network); Orange: CEN (Central Executive Network); Blue: OCC (Occipital); Gray: CeB (Cerebellum); Brown: BST (Brain Stem)

Abbreviations: ACgG\_S, Middle-anterior part of the cingulate gyrus and sulcus; Bst, Brainstem Network; CAN, Central Autonomic Network; CEN, Central Executive Network; ERN, Emotional Regulation Network; InfFGOpp, Opercular part of the inferior frontal gyrus; InfFGTrip, Triangular part of the inferior frontal gyrus; InfFS, Inferior frontal sulcus; IntPS\_TrPS, Intraparietal sulcus(interparietal sulcus) and transverse parietal sulci; LC, locus coeruleus; LinG, Lingual gyrus, lingual part of the medial occipito-temporal gyrus; OCC, Occipital Network; OrG, Orbital gyri; PaCL\_S, Paracentral lobule and sulcus; PRCG, Precentral gyrus; SbCG\_S, Subcentral gyrus and sulci; SMN, Sensorimotor Network; SupPL, Superior parietal lobule(lateral part of P1)

### **Supplemental Figure S2. Connectogram Depicting Differences in Brain Connectivity between Males with Food Addiction vs. Males with No Food Addiction**

Supplemental Figure 2 is a connectogram demonstrating significant differences in functional connectivity between males with food addiction and males with no food addiction. Analysis was performed Harvard-Oxford Subcortical atlases, the Schaefer 400 cortical atlas, and the Ascending Arousal Network brainstem atlas. Labels on the diagram are Destrieux, Harvard-Oxford Subcortical atlases, and the Ascending Arousal Network brainstem atlas equivalents. Red lines between two networks indicate greater functional connectivity, and blue lines indicate lowered functional connectivity. All connections are significant  $q < 0.05$ .

Legend: Light Green: SMN (Sensorimotor Network); Black: BG (Basal Ganglia); Purple: DMN (Default Mode Network); Yellow: SAL (Salience); Red: ERN (Emotional Regulation Network); Dark Green: CAN (Central Autonomic Network); Orange: CEN (Central Executive Network); Blue: OCC (Occipital); Gray: CeB (Cerebellum); Brown: BST (Brain Stem)

Abbreviations: ATrCoS, Anterior transverse collateral sulcus; Bst, Brainstem Network; CAN, Central Autonomic Network; CEN, Central Executive Network; CS, Central sulcus(Rolando's fissure); DMN, Default Mode Network; ERN, Emotional Regulation Network; InfFGOpp,

Opercular part of the inferior frontal gyrus; InfPrCS, Inferior part of the precentral sulcus; MOcG, Middle occipital gyrus; MFG, Middle frontal gyrus; MR, Median raphe nuclei; MRF, Mesencephalic reticular formation; OCC, Occipital Network; OrG, Orbital gyri; OrS, Orbital sulci (H-shaped sulci); PaCL\_S, Paracentral lobule and sulcus; PaHipG, Parahippocampal gyrus, parahippocampal part of the medial occipito-temporal gyrus; PBC, Parabrachial complex; PRCG, Precentral gyrus; PrCun, Precuneus; Tpo, temporal pole; SMN, Sensorimotor Network; SuMarG, Supramarginal gyrus

**Supplemental Table S1. Resting State Pairwise Connections Comparing Females with Food Addiction vs. Females with No Food Addiction**

| FEMALES WITH FOOD ADDICTION vs FEMALES WITH NO FOOD ADDICTION |                                              |         |                                      |     |       |          |          |                |
|---------------------------------------------------------------|----------------------------------------------|---------|--------------------------------------|-----|-------|----------|----------|----------------|
| Network                                                       | Analysis Unit                                | Network | Analysis Unit                        | df  | t     | p-value  | q-value  | Interpretation |
| <b>Brainstem<sup>97</sup> Connections</b>                     |                                              |         |                                      |     |       |          |          |                |
| Bst                                                           | LC (locus coeruleus)                         | ERN     | Right ACgG_S (Right DefaultA_PFCm_1) | 147 | 3.81  | 2.04E-04 | 0.04     | Greater        |
| Bst                                                           | LC (locus coeruleus)                         | ERN     | Left ACgG_S (Left DefaultA_PFCm_4)   | 147 | 3.80  | 2.11E-04 | 0.04     | Greater        |
| <b>Emotional Regulation (ERN) Connections</b>                 |                                              |         |                                      |     |       |          |          |                |
| ERN                                                           | Left InfFS (Left ContA_PFCLeft 2)            | SMN     | Left SbCG_S (Left SomMotB_S2_5)      | 147 | -4.33 | 2.74E-05 | 0.01     | Lower          |
| ERN                                                           | Right InfFGTrip (Right ContA_PFCLeft 1)      | SMN     | Left PaCL_S (Left SomMotA_14)        | 147 | -3.89 | 1.51E-04 | 0.03     | Lower          |
| ERN                                                           | Right InfFGTrip (Right ContA_PFCLeft 1)      | CEN     | Left SupPL (Left DorsAttnB_PostC_9)  | 147 | -4.09 | 7.08E-05 | 0.03     | Lower          |
| <b>Sensorimotor Network (SMN) Connections</b>                 |                                              |         |                                      |     |       |          |          |                |
| SMN                                                           | Right InfFGOpp (Right ContA_PFCLeft 2)       | SMN     | Left SbCG_S (Left SomMotB_S2_5)      | 147 | -4.26 | 3.63E-05 | 0.02     | Lower          |
| SMN                                                           | Left PRCG (Left SomMotA_9)                   | OCC     | Left LinG (Left VisCent_Striate_1)   | 147 | -3.97 | 1.12E-04 | 0.04     | Lower          |
| <b>Central Autonomic Network (CAN) Connections</b>            |                                              |         |                                      |     |       |          |          |                |
| CAN                                                           | Left ACgG_S (Left DefaultA_PFCm_2)           | SMN     | Left PaCL_S (Left SomMotA_19)        | 147 | 4.66  | 7.03E-06 | 3.00E-03 | Greater        |
| <b>Central Executive Network (CEN) Connections</b>            |                                              |         |                                      |     |       |          |          |                |
| CEN                                                           | Right IntPS_TrPS (Right DorsAttnA_SPLLeft 4) | CAN     | Left OrG (Left ContB_PFCIv_1)        | 147 | 4.10  | 6.81E-05 | 0.03     | Greater        |

Abbreviations: ACgG\_S, Middle-anterior part of thecingulate gyrus and sulcus; Bst, Brainstem Network; CAN, Central Autonomic Network; CEN, Central Executive Network; ERN, Emotional Regulation Network; InfFGOpp, Opercular part of the inferior frontal gyrus; InfFGTrip, Triangular part of the inferior frontal gyrus; InfFS, Inferior frontal sulcus; IntPS\_TrPS, Intraparietal sulcus(interparietal sulcus) and transverse parietal sulci; LC, locus coeruleus; LinG, Lingual gyrus, lingual part of the medial occipito-temporal gyrus; OCC, Occipital Network; OrG, Orbital gyri; PaCL\_S, Paracentral lobule and sulcus; PRCG, Precentral gyrus; SbCG\_S, Subcentral gyrus and sulci; SMN, Sensorimotor Network; SupPL, Superior parietal lobule(lateral part of P1)

df: degrees of freedom; p-value sig <.05, q-value (corrected for multiple comparisons) <.05

**Supplemental Table S2. Resting State Pairwise Connections Comparing Males with Food Addiction vs. Males with No Food Addiction**

| MALES WITH FOOD ADDICTION vs MALES WITH NO FOOD ADDICTION |                                                |         |                                          |     |       |          |      |                |
|-----------------------------------------------------------|------------------------------------------------|---------|------------------------------------------|-----|-------|----------|------|----------------|
| Network                                                   | Analysis Unit                                  | Network | Analysis Unit                            | df  | t     | p        | q    | Interpretation |
| <b>Brainstem<sup>97</sup> Connections</b>                 |                                                |         |                                          |     |       |          |      |                |
| Bst                                                       | MRF                                            | CEN     | Right MFG (Right ContB_PFCld_4)          | 147 | 3.66  | 3.51E-04 | 0.04 | Greater        |
| Bst                                                       | MRF                                            | CEN     | Right MFG (Right SalVentAttnB_PFCLeft 2) | 147 | 3.52  | 5.75E-04 | 0.04 | Greater        |
| Bst                                                       | MRF                                            | CEN     | Right MFG (Right SalVentAttnB_PFCLeft 3) | 147 | 3.45  | 7.32E-04 | 0.04 | Greater        |
| Bst                                                       | MRF                                            | CEN     | Left MFG (Left DefaultB_PFCLeft 1)       | 147 | 3.64  | 3.77E-04 | 0.04 | Greater        |
| Bst                                                       | MRF                                            | CAN     | Left OrG (Left ContB_PFClv_1)            | 147 | 3.39  | 8.98E-04 | 0.04 | Greater        |
| Bst                                                       | MRF                                            | CAN     | Left OrG (Left ContB_PFClv_1)            | 147 | 3.39  | 8.98E-04 | 0.04 | Greater        |
| Bst                                                       | MRF                                            | OCC     | Right MOcG (Right DefaultC_IPLeft 2)     | 147 | 3.57  | 4.83E-04 | 0.04 | Greater        |
| Bst                                                       | MRF                                            | SMN     | Right PRCG (Right SomMotA_7)             | 147 | -3.41 | 8.39E-04 | 0.04 | Lower          |
| Bst                                                       | MRF                                            | SMN     | Right CS (Right SomMotA_10)              | 147 | -3.41 | 8.39E-04 | 0.04 | Lower          |
| Bst                                                       | MR                                             | DMN     | Left ATrCoS (Left LimbicA_TempPole_5)    | 147 | -4.04 | 8.58E-05 | 0.04 | Lower          |
| Bst                                                       | PBC                                            | ERN     | Left PaHipG (Left LimbicA_TempPole_3)    | 147 | -4.07 | 7.65E-05 | 0.03 | Lower          |
| <b>Salience Network (SAL) Connections</b>                 |                                                |         |                                          |     |       |          |      |                |
| SAL                                                       | Left InfFGOpp (Left SalVentAttnA_FrOpeRight 1) | SMN     | Left InfPrCS (Left ContA_PFCLeft 1)      | 147 | 4.08  | 7.36E-05 | 0.03 | Greater        |
| <b>Sensorimotor Network (SMN) Connections</b>             |                                                |         |                                          |     |       |          |      |                |
| SMN                                                       | Left PaCL_S (Left SomMotA_19)                  | CEN     | Left MFG (Left ContB_PFCd_1)             | 147 | -4.00 | 1.00E-04 | 0.04 | Lower          |
| <b>Default Mode Network (DMN) Connections</b>             |                                                |         |                                          |     |       |          |      |                |

|     |                                     |     |                                  |     |      |          |      |         |
|-----|-------------------------------------|-----|----------------------------------|-----|------|----------|------|---------|
| DMN | Right SuMarG (Right TempPaRight 10) | DMN | Right PrCun (Right ContC_pCun_3) | 147 | 4.15 | 5.61E-05 | 0.02 | Greater |
| DMN | Left Tpo (Left LimbicA_TempPole_1)  | CAN | Right OrS (Right LimbicB_OFC_2)  | 147 | 4.07 | 7.65E-05 | 0.03 | Greater |

Abbreviations: ATrCoS, Anterior transverse collateral sulcus; Bst, Brainstem Network; CAN, Central Autonomic Network; CEN, Central Executive Network; CS, Central sulcus(Rolando's fissure); DMN, Default Mode Network; ERN, Emotional Regulation Network; InfFGOpp, Opercular part of the inferior frontal gyrus; InfPrCS, Inferior part of the precentral sulcus; MOcG, Middle occipital gyrus; MFG, Middle frontal gyrus; MR, Median raphé nuclei; MRF, Mesencephalic reticular formation; OCC, Occipital Network; OrG, Orbital gyri; OrS, Orbital sulci(H-shaped sulci); PaCL\_S, Paracentral lobule and sulcus; PaHipG, Parahippocampal gyrus, parahippocampal part of the medial occipito-temporal gyrus; PBC, Parabrachial complex; PRCG, Precentral gyrus; PrCun, Precuneus; Tpo, temporal pole; SAL, Saliience Network; SMN, Sensorimotor Network; SuMarG, Supramarginal gyrus

df: degrees of freedom; p value significant <.05, q value (corrected for multiple comparisons) <.05

# Connectogram Depicting Differences in Brain Connectivity between Females with Food Addiction vs. Females with no Food Addiction

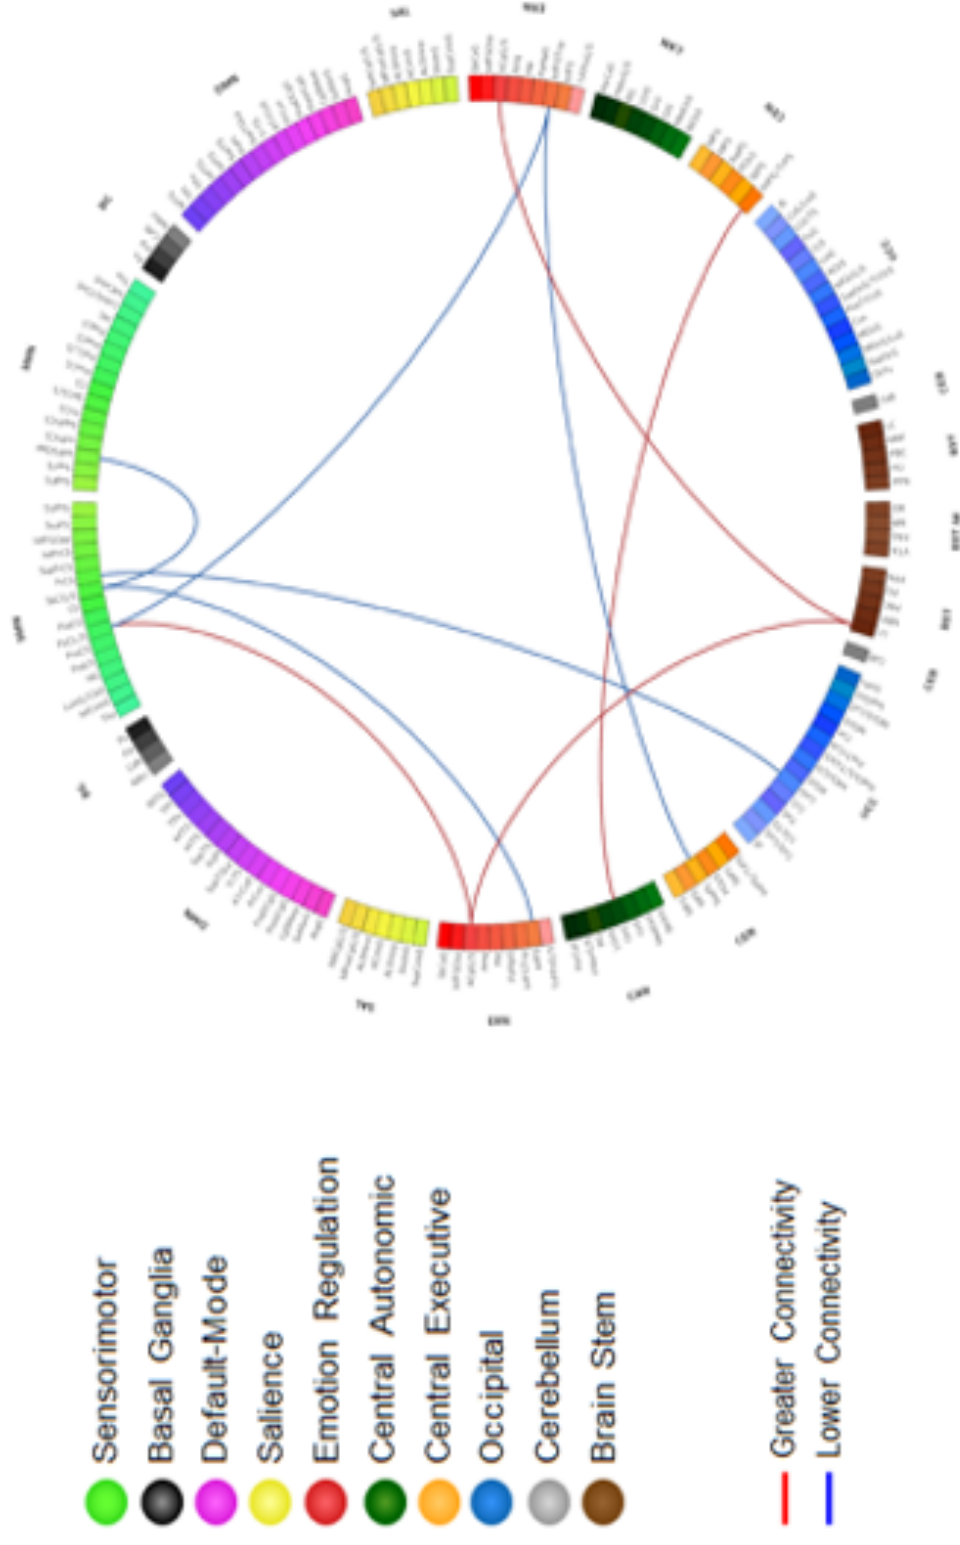



# Connectogram Depicting Differences Brain Connectivity between Males with Food Addiction vs. Males with no Food Addiction

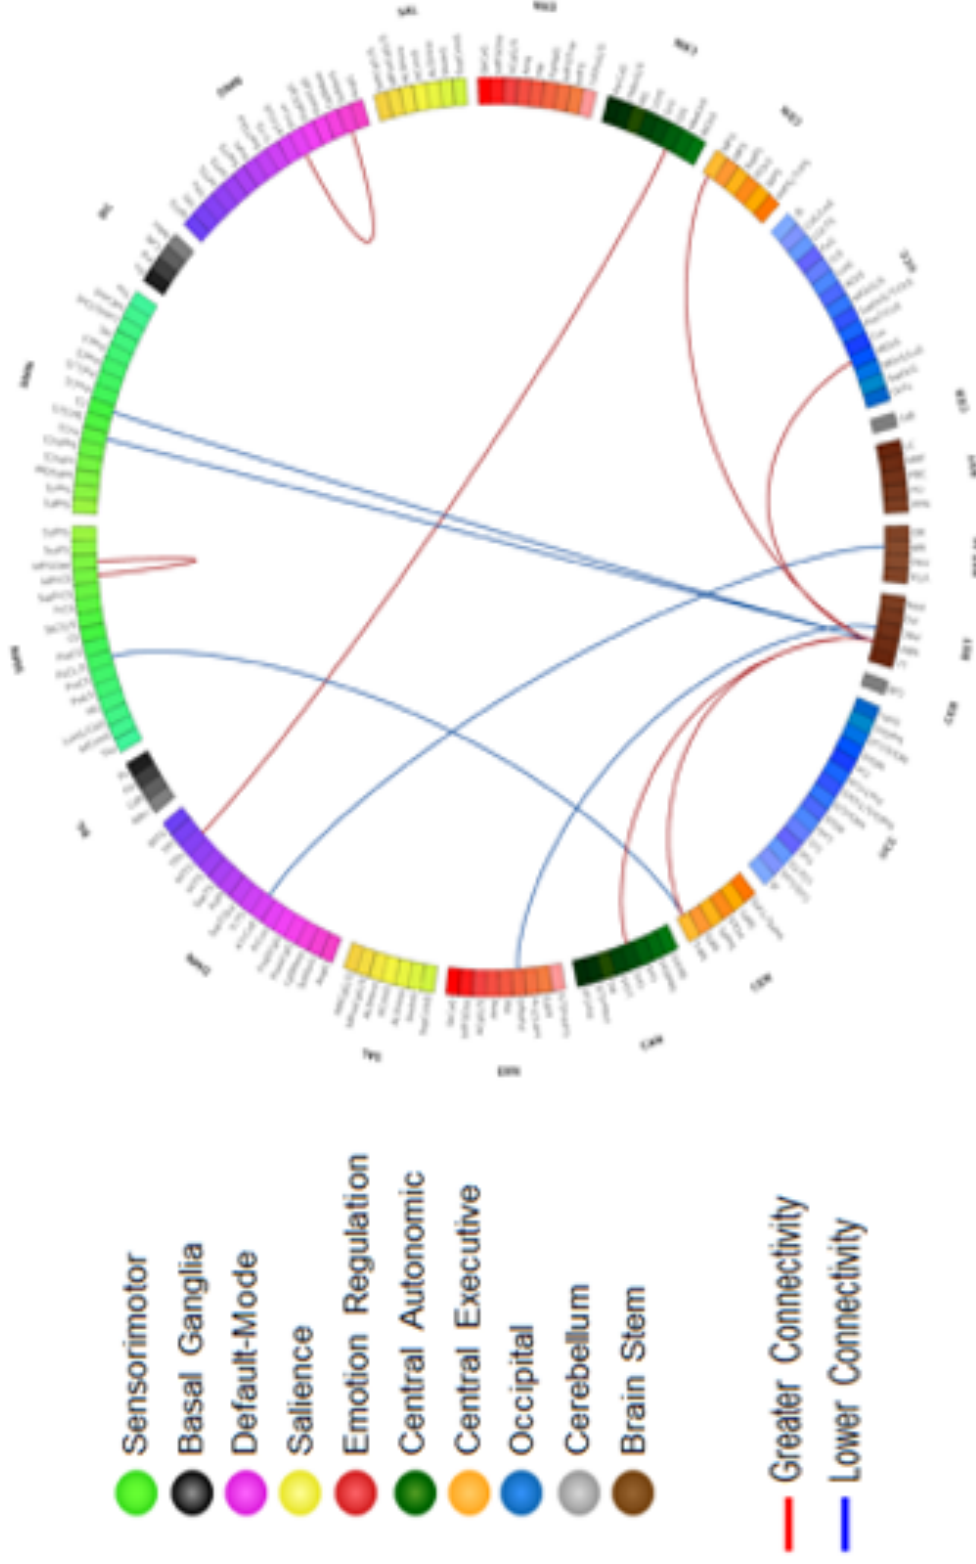

Supplement: 41598_2021_83116_MOESM1_ESM.pdf [file 41598_2021_83116_MOESM1_ESM.pdf]
